# Supplementary material for: Transcriptomic and proteomic analysis reveals mechanisms of low pollen-pistil compatibility during water lily cross breeding
Source: BMC Plant Biol. 2019 Dec 5;19:542. doi: 10.1186/s12870-019-2166-3 (PMC6896271; doi:10.1186/s12870-019-2166-3)
Supplement: Supplementary file 7 — Additional file 7. KEGG enrichment analysis of the cor-DEGs-DEPs genes. [file 12870_2019_2166_MOESM7_ESM.xls]

## Sheet: 2HAP vs 0HAP
Map.ID	Map.Name	Proteome_num	Proteome_ids	Proteome_pvalue	Proteome_FDR	Transcriptome_num	Transcriptome_ids	Transcriptome_pvalue	Transcriptome_FRD	Correlations_id	Correlations_num
ko00073	Cutin, suberine and wax biosynthesis	4	TRINITY_DN53940_c2_g1|TRINITY_DN54382_c0_g2|TRINITY_DN51485_c1_g3|TRINITY_DN49659_c0_g1	0.000135515	0.0125225	8	TRINITY_DN38654_c4_g1|TRINITY_DN39140_c0_g1|TRINITY_DN51042_c1_g2|TRINITY_DN47006_c0_g1|TRINITY_DN51485_c1_g3|TRINITY_DN51042_c1_g3|TRINITY_DN55759_c1_g1|TRINITY_DN47247_c0_g2	4.05e-05	0.00186517	TRINITY_DN51485_c1_g3|TRINITY_DN51485_c1_g3	1
ko00940	Phenylpropanoid biosynthesis	10	TRINITY_DN37660_c4_g2|TRINITY_DN46121_c2_g1|TRINITY_DN53782_c2_g1|TRINITY_DN54112_c2_g1|TRINITY_DN53492_c0_g1|TRINITY_DN50202_c1_g1|TRINITY_DN35842_c4_g1|TRINITY_DN35350_c0_g1|TRINITY_DN49956_c3_g1|TRINITY_DN39409_c2_g1	0.000178893	0.0125225	28	TRINITY_DN50894_c0_g2|TRINITY_DN50489_c0_g1|TRINITY_DN44553_c2_g1|TRINITY_DN56211_c0_g1|TRINITY_DN35350_c0_g1|TRINITY_DN51768_c0_g1|TRINITY_DN47551_c0_g1|TRINITY_DN38806_c2_g1|TRINITY_DN38806_c2_g2|TRINITY_DN29931_c0_g1|TRINITY_DN50219_c2_g1|TRINITY_DN50868_c0_g1|TRINITY_DN46121_c2_g1|TRINITY_DN43096_c0_g3|TRINITY_DN43772_c0_g1|TRINITY_DN34441_c0_g1|TRINITY_DN39391_c1_g1|TRINITY_DN56645_c1_g1|TRI…	3.85e-10	8.86e-08	TRINITY_DN35350_c0_g1|TRINITY_DN35350_c0_g1,TRINITY_DN37660_c4_g2|TRINITY_DN37660_c4_g2,TRINITY_DN46121_c2_g1|TRINITY_DN46121_c2_g1,TRINITY_DN53782_c2_g1|TRINITY_DN53782_c2_g1	4
ko00941	Flavonoid biosynthesis	5	TRINITY_DN46121_c2_g1|TRINITY_DN44636_c2_g1|TRINITY_DN55094_c2_g2|TRINITY_DN35350_c0_g1|TRINITY_DN39409_c2_g1	0.00239802	0.111908	8	TRINITY_DN44636_c2_g1|TRINITY_DN55933_c1_g1|TRINITY_DN50894_c0_g2|TRINITY_DN50489_c0_g1|TRINITY_DN35350_c0_g1|TRINITY_DN55094_c2_g2|TRINITY_DN49882_c1_g2|TRINITY_DN46121_c2_g1	0.0114309	0.131455	TRINITY_DN35350_c0_g1|TRINITY_DN35350_c0_g1,TRINITY_DN44636_c2_g1|TRINITY_DN44636_c2_g1,TRINITY_DN46121_c2_g1|TRINITY_DN46121_c2_g1,TRINITY_DN55094_c2_g2|TRINITY_DN55094_c2_g2	4
ko00945	Stilbenoid, diarylheptanoid and gingerol biosynthesis	3	TRINITY_DN46121_c2_g1|TRINITY_DN35350_c0_g1|TRINITY_DN39409_c2_g1	0.0110638	0.387233	4	TRINITY_DN50894_c0_g2|TRINITY_DN50489_c0_g1|TRINITY_DN35350_c0_g1|TRINITY_DN46121_c2_g1	0.0147177	0.161194	TRINITY_DN35350_c0_g1|TRINITY_DN35350_c0_g1,TRINITY_DN46121_c2_g1|TRINITY_DN46121_c2_g1	2

## Sheet: 6 HAP VS 0HAP
Map.ID	Map.Name	Proteome_num	Proteome_ids	Proteome_pvalue	Proteome_FDR	Transcriptome_num	Transcriptome_ids	Transcriptome_pvalue	Transcriptome_FRD	Correlations_id	Correlations_num
ko00940	Phenylpropanoid biosynthesis	9	TRINITY_DN37660_c4_g2|TRINITY_DN50219_c2_g1|TRINITY_DN46121_c2_g1|TRINITY_DN53782_c2_g1|TRINITY_DN53492_c0_g1|TRINITY_DN35350_c0_g1|TRINITY_DN39409_c2_g1|TRINITY_DN50202_c1_g1|TRINITY_DN49956_c3_g1	0.00238923	0.259617	35	TRINITY_DN45352_c0_g1|TRINITY_DN50894_c0_g2|TRINITY_DN43379_c0_g4|TRINITY_DN50489_c0_g1|TRINITY_DN44553_c2_g1|TRINITY_DN56211_c0_g1|TRINITY_DN35350_c0_g1|TRINITY_DN51768_c0_g1|TRINITY_DN47551_c0_g1|TRINITY_DN35747_c0_g1|TRINITY_DN38806_c2_g1|TRINITY_DN50219_c2_g1|TRINITY_DN50868_c0_g1|TRINITY_DN46121_c2_g1|TRINITY_DN34889_c0_g1|TRINITY_DN39018_c0_g1|TRINITY_DN43096_c0_g3|TRINITY_DN50202_c1_g1|TRI…	6.98e-13	8.27e-11	TRINITY_DN35350_c0_g1|TRINITY_DN35350_c0_g1,TRINITY_DN37660_c4_g2|TRINITY_DN37660_c4_g2,TRINITY_DN46121_c2_g1|TRINITY_DN46121_c2_g1,TRINITY_DN50202_c1_g1|TRINITY_DN50202_c1_g1,TRINITY_DN50219_c2_g1|TRINITY_DN50219_c2_g1,TRINITY_DN53782_c2_g1|TRINITY_DN53782_c2_g1	6
ko00945	Stilbenoid, diarylheptanoid and gingerol biosynthesis	3	TRINITY_DN46121_c2_g1|TRINITY_DN35350_c0_g1|TRINITY_DN39409_c2_g1	0.016262	0.473734	5	TRINITY_DN50894_c0_g2|TRINITY_DN43379_c0_g4|TRINITY_DN50489_c0_g1|TRINITY_DN35350_c0_g1|TRINITY_DN46121_c2_g1	0.00534623	0.0745327	TRINITY_DN35350_c0_g1|TRINITY_DN35350_c0_g1,TRINITY_DN46121_c2_g1|TRINITY_DN46121_c2_g1	2
